# Supplementary material for: Transferability and Polymorphism of SSR Markers Located in Flavonoid Pathway Genes in Fragaria and Rubus Species
Source: MDPI journal article supplement (doi:10.3390/genes11010011), 2019-12-21
Supplement: s1 [file s1]

**Table S1.** Data on 25 SSR loci and their PCR primer pairs used to genotype *Fragaria* and *Rubus* specimens.

| Locus          | Gene                                | GenBank accession number | Motif and number of repeats                                       | SSR location | Primer binding site location <sup>1</sup> | Forward (F) and reverse (R) primer nucleotide sequences | T, C° | Allele size, bp |                    |                 |
|----------------|-------------------------------------|--------------------------|-------------------------------------------------------------------|--------------|-------------------------------------------|---------------------------------------------------------|-------|-----------------|--------------------|-----------------|
|                |                                     |                          |                                                                   |              |                                           |                                                         |       | expected        | in <i>Fragaria</i> | in <i>Rubus</i> |
| <i>RiG001</i>  | aromatic polyketide synthase (PKS3) | AF292369                 | (AT) <sub>6</sub>                                                 | in           | in-ex2                                    | F: TGTCCGATCCTTTCTTTGG<br>R: CGCTTCTTGATCCTTGACTTGT     | 55    | 345             | -                  | 0, 349, 351     |
| <i>FaF3H01</i> | flavonoid 3'-hydroxylase            | KC708489                 | (AT) <sub>8</sub><br>(AACAA) <sub>2</sub><br>(TTCTT) <sub>2</sub> | 5'UTR        | 5'UTR-5'UTR                               | F: TCCACATCTCTCTCCCATTCAT<br>R: GGTGTGCCGAAGAGTTAGTAGG  | 60    | 359             | 300-357            | -               |
| <i>FaFH01</i>  | flavanone 3-hydroxylase             | AY691919                 | (ATTTT) <sub>2</sub>                                              | in1          | ex1-ex2                                   | F: TCATCGTTTCCAGCCATTTAC<br>R: ATGCCTCCTTCTCTAAACCCAT   | 60    | 376             | 346-378            | 0, 341-372      |
| <i>RcFH01</i>  | flavanone-3-hydroxylase             | EU255776                 | (TATG) <sub>3</sub>                                               | in2          | in2-ex3                                   | F: GGTCCAAGTGCATTCCATATTAC<br>R: GTTCTTGAATCTCCCGTTGCT  | 60    | 262             | -                  | 0, 255-299      |
| <i>FaFS01</i>  | flavonol synthase                   | DQ834905                 | (CT) <sub>12</sub> -(CA) <sub>12</sub><br>(AAGAC) <sub>2</sub>    | in2<br>ex3   | ex2-ex3                                   | F: CATCCCTAATGCCCTAGTCATC<br>R: TGTACTTCGGTGGATTCTCCTT  | 60    | 304             | 272-315            | 0, 291-336      |
| <i>FaFS02</i>  | flavonol synthase                   | DQ834905                 | (GGAAG) <sub>2</sub>                                              | ex1          | ex1-ex1                                   | F: AAGCTCCTCAAACAAATCTTCG<br>R: GTAGTTAATGGCAGAAGGTGGC  | 60    | 273             | 253, 271           | 271             |
| <i>FaDR01</i>  | dihydroflavonol 4-reductase         | AY575057                 | (ATT) <sub>14</sub>                                               | 5'UTR        | 5'UTR-5'UTR                               | F: GCCCACCTCGTAACCTTGTACT<br>R: CTTTCATGGGTGTCTTGTTGT   | 60    | 263             | 0, 237-293         | -               |
| <i>RhDR01</i>  | dihydroflavonol 4-reductase         | JF764809                 | (TTGT) <sub>3</sub>                                               | in2          | in2-in2/ex3                               | F: TTTGTGTTTGAAGGAGCACATC<br>R: ATTGCTTACCCAACCAGTCATT  | 60    | 400             | -                  | -               |
| <i>RhDR02</i>  | dihydroflavonol 4-reductase         | JF764809                 | (CTTCC) <sub>2</sub>                                              | in1          | ex1-in1/ex2                               | F: ATTCATCGGCTCTTGTTTATG<br>R: CTTACCTTCTTCTGATTTCGCT   | 60    | 191             | -                  | -               |
| <i>FaLR01</i>  | leucoanthocyanidin reductase        | DQ834906                 | (CAAAT) <sub>2</sub>                                              | in2          | ex2-in2                                   | F: ATCACCTAGTCGAAGCCATTA<br>R: GGTCATCAGTCCAAACACAGAA   | 60    | 138             | 0, 126-136         | 0, 134, 136     |
| <i>FaAS01</i>  | anthocyanidin synthase              | AY695818                 | (CTTGG) <sub>2</sub>                                              | ex2          | in-ex2                                    | F: ATACGTTTTGCTAAGTGGCGTC<br>R: CTGAGGGCATTGTTGGGTAGTAG | 60    | 211             | 207                | -               |
| <i>RiAS01</i>  | anthocyanidin synthase              | KX950789                 | (ATCTC) <sub>2</sub>                                              | ex2          | ex2-ex2                                   | F: TCAACAAGGAGAAGGTGAGGAT<br>R: CCGTTAGGAGAGATGAAAGCAG  | 60    | 334             | 261-333            | 261-357         |
| <i>FaAR01</i>  | anthocyanidin reductase             | DQ664193                 | (TGCTG) <sub>2</sub><br>(CATTT) <sub>2</sub>                      | ex4<br>in4   | ex4-ex5                                   | F: AATCTGCTTCTGGTCGGTACAT<br>R: AGAGAGTATGGTCTTCGCCTTG  | 60    | 244             | 227-242            | 250             |
| <i>RhAR01</i>  | anthocyanidin reductase             | KR732618                 | (GCTGC) <sub>2</sub>                                              | ex5          | ex5-ex5/in5                               | F: AATCTGCTTCTGGTCGGTACAT<br>R: GGTTAAAGGGAGGGCTTACTCA  | 60    | 122             | -                  | -               |
| <i>FaFG01</i>  | flavonoid 3-O-glucosyltransferase   | AY695816                 | (TACG) <sub>3</sub><br>(CGC) <sub>4</sub>                         | 5'UTR<br>ex1 | 5'UTR-ex1                                 | F: CTGAAGAGTGGTTGTTGGATTG<br>R: TGCTTGGTGTGAAGAAAGAGA   | 60    | 323             | 293-345            | -               |

| Locus         | Gene                                                       | GenBank accession number | Motif and number of repeats                                                                                 | SSR location | Primer binding site location <sup>1</sup> | Forward (F) and reverse (R) primer nucleotide sequences | T, C° | Allele size, bp |                    |                 |
|---------------|------------------------------------------------------------|--------------------------|-------------------------------------------------------------------------------------------------------------|--------------|-------------------------------------------|---------------------------------------------------------|-------|-----------------|--------------------|-----------------|
|               |                                                            |                          |                                                                                                             |              |                                           |                                                         |       | expected        | in <i>Fragaria</i> | in <i>Rubus</i> |
| <i>RhUF01</i> | UDP-glucose flavonoid 3-O-glycosyltransferase-like protein | JF764808                 | (GAG) <sub>7</sub><br>(ACAAGC) <sub>2</sub>                                                                 | ex2          | ex2–ex2                                   | F: AGGAGCTGAAGAAAAGACTCCA<br>R: AAAGTCCTCTAGGTTTCCCCTG  | 60    | 275             | -                  | 267-279         |
| <i>FaMY01</i> | transcription factor MYB10                                 | EU155162                 | (TTTAT) <sub>2</sub><br>(GT) <sub>5</sub><br>(TA) <sub>6</sub><br>(TA) <sub>5</sub><br>(AAATC) <sub>2</sub> | in2          | in2–in2                                   | F: CTACGGCTTATTCTTGCCTAGC<br>R: TGTCAAACCTACACCGTTCAAG  | 60    | 383             | 0, 370-385         | -               |
| <i>FaMY02</i> | transcription factor MYB10                                 | EU155162                 | (AT) <sub>32</sub> -(GT) <sub>5</sub><br>(TTTCT) <sub>2</sub>                                               | in2          | in2–ex3                                   | F: TTGAACGGTGTAGGTTTGACAT<br>R: TTCTTCACATCATTGGCAGTTC  | 60    | 310             | 0, 267-335         | -               |
| <i>RiMY01</i> | transcription factor MYB10                                 | EU155165                 | (TAATA) <sub>2</sub><br>(CT) <sub>7</sub><br>(AT) <sub>15</sub>                                             | in1          | ex1/in1–ex2                               | F: GTTCCTCTCCAAGCAGGTTATT<br>R: TGCAAAGTCTCCTCTCTTGATG  | 59    | 330             | 206-239            | 0, 228-385      |
| <i>RiHL01</i> | basic helix loop helix regulatory protein (bHLH)           | EU862822                 | (TACTA) <sub>2</sub>                                                                                        | in           | ex1–in                                    | F: TTGCAGAGGAATGAGCAACTTA<br>R: CAAACTATGGAACAAACGAGGA  | 60    | 336             | 291-299            | 286-338         |
| <i>RiTT01</i> | transparent testa glabra 1 (TTG1) protein                  | HM579852                 | (CAC) <sub>5</sub>                                                                                          | ex           | ex–ex                                     | F: ACTCCACACAAGAATCCCATCT<br>R: CTGTTGTTCAAGACCGAAATTG  | 60    | 379             | -                  | 379, 382        |
| <i>FaCH01</i> | class II chitinase                                         | AF147091                 | (CAAAA) <sub>2</sub><br>(CATCTT) <sub>2</sub><br>(TCTTCC) <sub>2</sub>                                      | ex1          | 5'UTR–ex1                                 | F: TGCTGATGCTAACTTCCTTTGA<br>R: ATGCAGTGTGCTCCTTGTGTAG  | 60    | 324             | 310-329            | 0, 320-329      |
| <i>FaCH02</i> | class II chitinase                                         | AF147091                 | (AATTAT) <sub>2</sub><br>(AGGCA) <sub>2</sub><br>(GAAGCC) <sub>2</sub>                                      | ex2          | in–ex2                                    | F: TGAGAAATGGATGTTGTTCCAC<br>R: AGCACATATCGACCTACCATGA  | 60    | 279             | 259-282            | -               |
| <i>FaTG01</i> | ToyoGluIII gene for β-1,3-glucanase                        | AB106362                 | (TCAAGT) <sub>2</sub>                                                                                       | ex2          | ex2–ex2                                   | F: AGGATGAGGATTTATGAGCCAA<br>R: AGGGTCCAAAAGGGTTGTATCT  | 60    | 327             | 309, 324           | 318-336         |
| <i>FaBG01</i> | β-1,3-glucanase (BG2-2)                                    | AY989818                 | (GAGAG) <sub>2</sub><br>(GCGGGA) <sub>2</sub><br>(GA) <sub>9</sub>                                          | 5'UTR        | 5'UTR–5'UTR                               | F: TTACCTAGCTCAAGAGGGAGCA<br>R: GTTTGGAAAGCCACACTTTT    | 60    | 364             | 328-388            | -               |

<sup>1</sup>based on the reference sequence; in – intron, ex – exon
