# Supplementary material for: Transferability and Polymorphism of SSR Markers Located in Flavonoid Pathway Genes in Fragaria and Rubus Species
Source: MDPI journal article supplement (doi:10.3390/genes11010011), 2019-12-21
Supplement: s1 [file s1]

Reference sequence (1): F\_x\_ananassa\_(cv\_Chandler)  
Identities normalised by aligned length.  
Colored by: identity

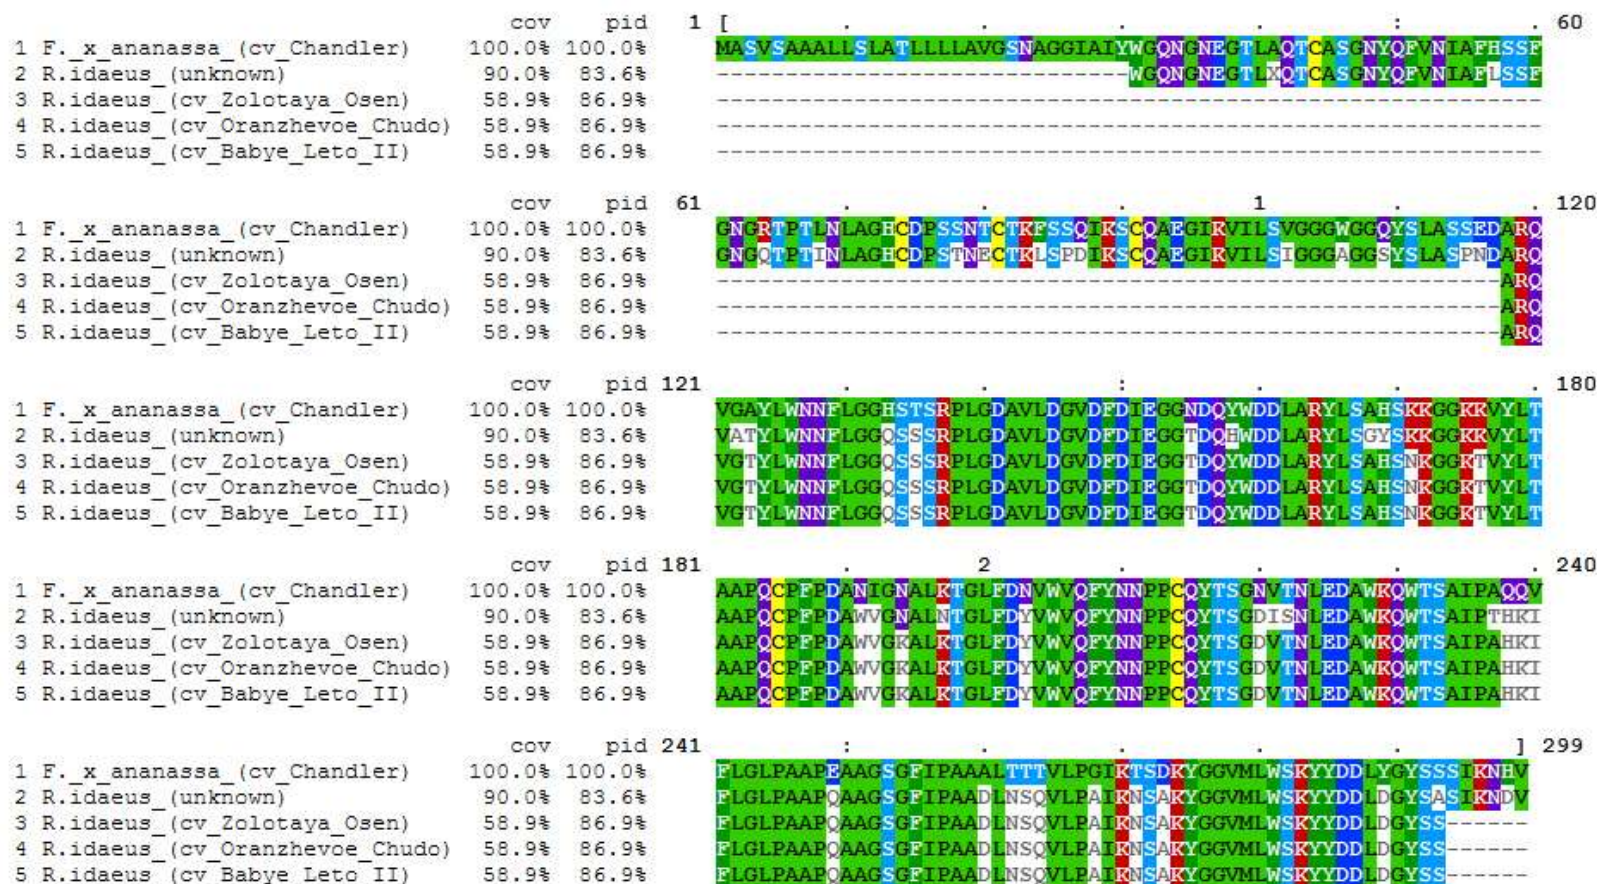

**Figure S1.** Alignment of the chitinase III amino acid sequences from strawberry *Fragaria × ananassa* cv. Chandler (AF134347) and raspberry *Rubus idaeus* cultivars Zolotaya Osen (MK333194), Oranzhevoe Chudo (MK333195), Babye Leto II (MK333196), and of unknown origin (Marzban et al. 2008 [33]). Identical amino acid positions are highlighted by the same color.
